# Supplementary material for: Characterization of Evapotranspiration in the Orange River Basin of South Africa-Lesotho with Climate and MODIS Data
Source: MDPI journal article supplement (doi:10.3390/w15081501), 2023-04-12
Supplement: s1 [file s1]

Archive with 1 entries (1 files):
- water-2252913-supplementary.pdf
