# Supplementary material for: Characterization of Evapotranspiration in the Orange River Basin of South Africa-Lesotho with Climate and MODIS Data
Source: MDPI journal article supplement (doi:10.3390/w15081501), 2023-04-12
Supplement: s1 [file s1 › water-2252913-supplementary.pdf]

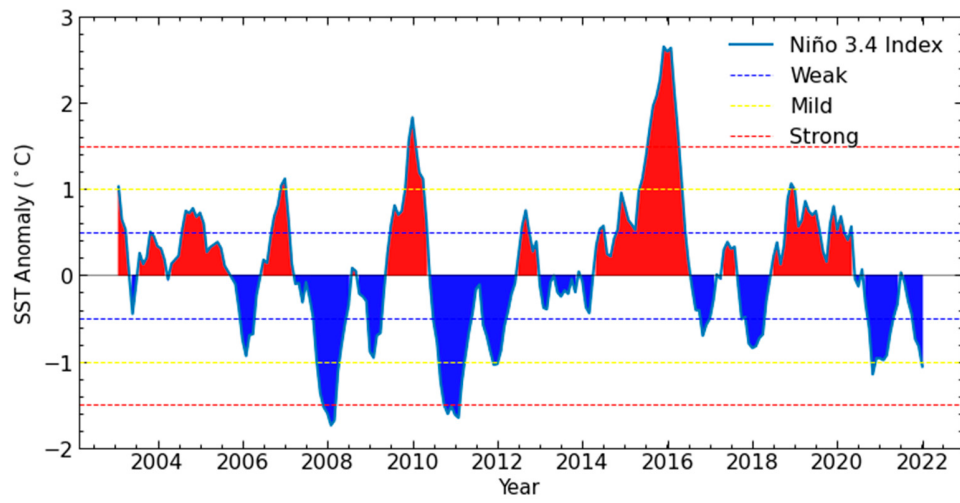

Figure S1. Standardized monthly Niño 3.4 anomalies from 2003 to 2021, showing warm (red) and cold (blue) phases of abnormal sea surface temperatures (SST) in the tropical Pacific Ocean.
